# Supplementary material
Source: PubMed Central journal article supplement (PMC8867388)
Supplement: jamasurg-e217588-s001.pdf [file jamasurg-e217588-s001.pdf]

## Supplemental Online Content

Fiore M, Baia M, Conti L, et al. Residual adrenal function after multivisceral resection with adrenalectomy in adult patients. *JAMA Surg*. Published online February 23, 2022.  
doi:10.1001/jamasurg.2021.7588

**eFigure 1.** Study consort diagram

**eFigure 2.** Detailed hemodynamic algorithm for intraoperative and postoperative management

**eTable 1.** Quality of life in patients with or without long-term AI after multivisceral retroperitoneal resection

**eTable 2.** Vasoactive Inotropic Score

This supplemental material has been provided by the authors to give readers additional information about their work.

eFigure 1. Study consort diagram

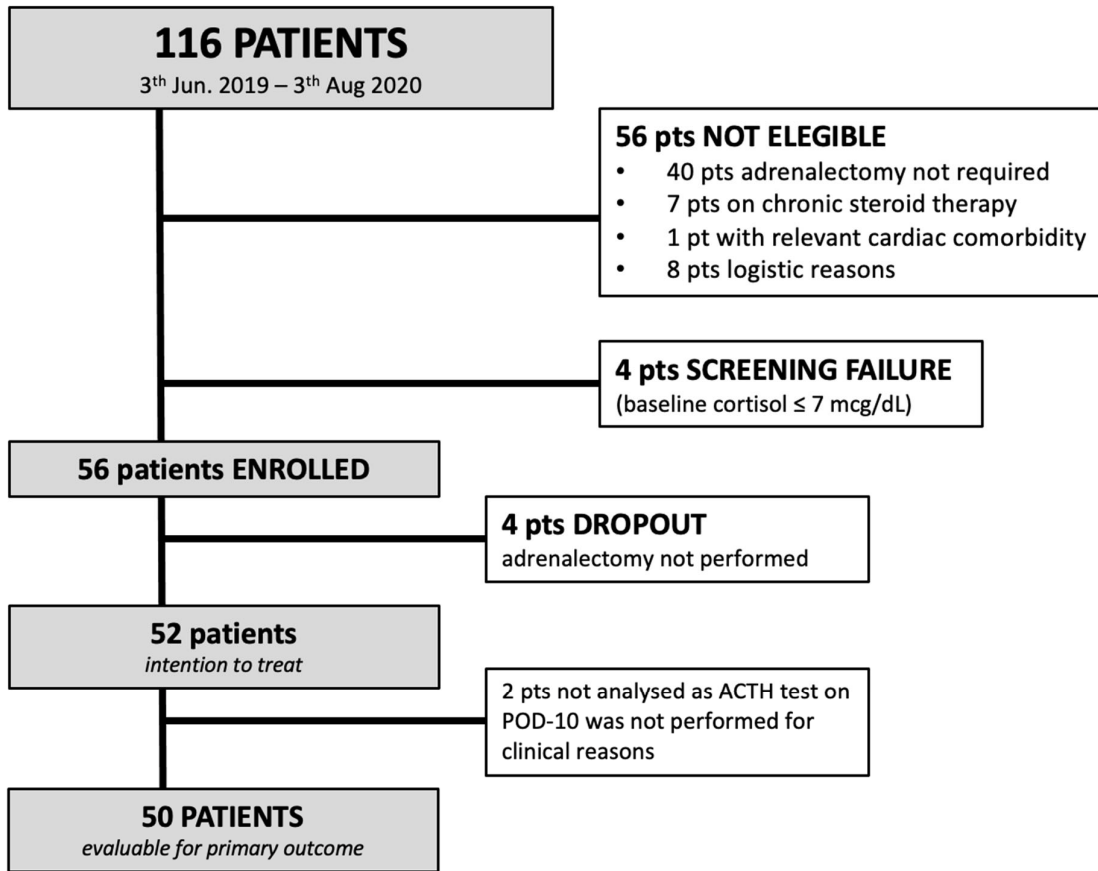

**eFigure 2. Detailed hemodynamic algorithm for intraoperative and postoperative management.**

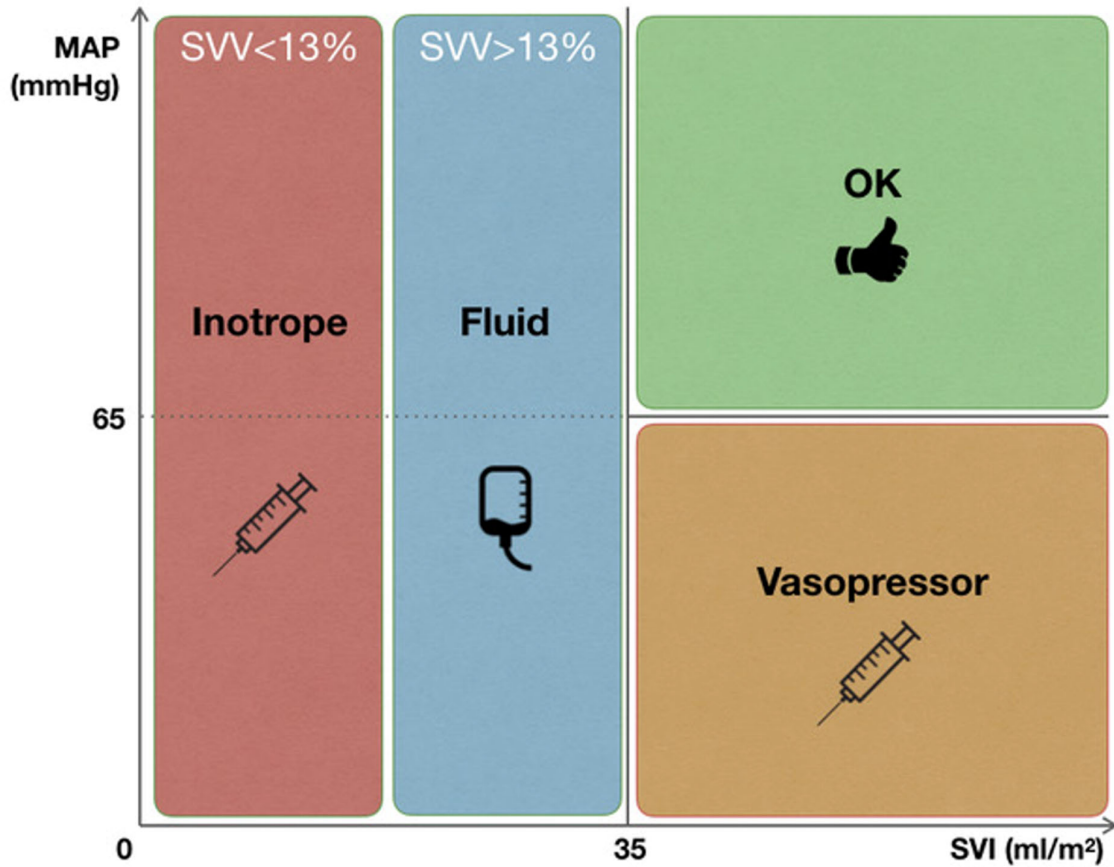

Intraoperatively, the basal crystalloid infusion rate was set at 3 ml/kg/h. In case of hypotension (MAP < 65 mmHg for at least 1 minute) and normal stroke volume index (SVI > 35 ml/m<sup>2</sup>), a vasopressor administration was started (norepinephrine as first choice). In the event of a decrease of SVI, the intervention was guided by the value of stroke volume variation (SVV). An SVV > 13%, suggesting a state of fluid response, was managed with a fluid challenge bolus of ringer's acetate (3 ml/kg over 10 minutes). The patient was considered a fluid responder in case of a 10% increase in SVI. In this case the fluid challenge could be repeated until SVI was normalized. For SVI < 35 ml/m<sup>2</sup> and SVV < 13%, dobutamine was started at 3 mcg/kg/min and increased to raise SVI to normal. The hemodynamic status was always analyzed also considering other parameters (heart rate, ScvO<sub>2</sub>, serum lactate, base excess, CO<sub>2</sub>-gap between arterial and central venous blood), the plan of anesthesia and surgical manipulations. Additionally, colloids and red blood cells could be administered to counteract blood loss. Crystalloids or parenteral nutrition at 1.5 ml/kg/h were provided during the postoperative period until the 5th postoperative day. Thereafter, the infusion rate was set at 0.5 ml/kg/h until adequate oral intake was achieved. Hypotension was treated with supplemental ringer's acetate up to 500 ml/12 h.

**eTable 1. Quality of life in patients with or without long-term AI after multivisceral retroperitoneal resection.** AddiQoL was administered at least 4 months after surgery to patients alive and disease-free from sarcoma.

| ITEM AddiQoL questionnaire                               | Overall   | AI              | AI             | P            |
|----------------------------------------------------------|-----------|-----------------|----------------|--------------|
|                                                          |           | > 4 months: YES | > 4 months: NO |              |
| 1. I feel good about my health                           | 5 (5 – 6) | 5 (4 – 5)       | 5 (5 – 6)      | 0.06         |
| Evaluable patients                                       | 44        | 15              | 23             |              |
| 2. I can keep going during the day without feeling tired | 4 (3 – 5) | 4 (3 – 5)       | 5 (4 – 5)      | 0.11         |
| Evaluable patients                                       | 44        | 15              | 23             |              |
| 3. Normal daily activities make me tired                 | 4 (4 – 5) | 4 (4 – 4)       | 4 (4 – 5)      | 0.09         |
| Evaluable patients                                       | 44        | 15              | 23             |              |
| 4. I have to struggle to finish jobs                     | 6 (5 -6)  | 4 (4 – 5)       | 5 (4 – 6)      | <b>0.04*</b> |
| Evaluable patients                                       | 43        | 15              | 22             |              |
| 5. I have to push myself to do things                    | 5 (4 – 5) | 4 (4 – 5)       | 5 (5 – 6)      | 0.2          |
| Evaluable patients                                       | 44        | 15              | 23             |              |
| 6. I lose track of what I want to say                    | 6 (4 – 6) | 6 (5 – 6)       | 6 (4 – 6)      | 0.99         |
| Evaluable patients                                       | 44        | 15              | 23             |              |
| 7. I sleep well                                          | 5 (4 – 5) | 5 (4 – 5)       | 5 (5 – 6)      | 0.23         |
| Evaluable patients                                       | 44        | 15              | 23             |              |
| 8. I feel rested when I wake up in the morning           | 5 (4 – 6) | 5 (4 – 5)       | 5 (5 – 6)      | 0.12         |
| Evaluable patients                                       | 44        | 15              | 23             |              |
| 9. I feel unwell first thing in the morning              | 5 (5 – 6) | 5 (5 – 6)       | 5 (5 – 6)      | 0.42         |
| Evaluable patients                                       | 44        | 15              | 23             |              |
| 10. I am satisfied with my sex life                      | 4 (3 – 5) | 4 (3 – 5)       | 4 (3 – 6)      | 0.84         |
| Evaluable patients                                       | 39        | 15              | 20             |              |
| 11. I am relaxed                                         | 4 (3 – 5) | 4 (4 – 5)       | 5 (4 – 5)      | 0.84         |
| Evaluable patients                                       | 44        | 15              | 23             |              |
| 12. I feel low or depressed                              | 5 (4 – 6) | 5 (4 – 6)       | 5 (4 – 6)      | 0.57         |
| Evaluable patients                                       | 44        | 15              | 23             |              |
| 13. I am irritable                                       | 5 (4 – 5) | 5 (4 – 5)       | 4 (4 – 5)      | 0.66         |
| Evaluable patients                                       | 44        | 15              | 23             |              |
| 14. I find it difficult to think clearly                 | 6 (5 -6)  | 6 (5 – 6)       | 6 (6 – 6)      | 0.26         |
| Evaluable patients                                       | 44        | 15              | 23             |              |
| 15. I feel lightheaded                                   | 6 (6 – 6) | 6 (6 – 6)       | 6 (6 – 6)      | 0.37         |
| Evaluable patients                                       | 44        | 15              | 23             |              |

|                                                                                                                                                                                                                                                                                    |                           |                           |                           |              |
|------------------------------------------------------------------------------------------------------------------------------------------------------------------------------------------------------------------------------------------------------------------------------------|---------------------------|---------------------------|---------------------------|--------------|
| 16. I sweat for no particular reason                                                                                                                                                                                                                                               | 6 (5 -6)                  | 6 (5 – 6)                 | 6 (6 – 6)                 | <b>0.04*</b> |
| Evaluable patients                                                                                                                                                                                                                                                                 | 44                        | 15                        | 23                        |              |
| 17. I get headaches                                                                                                                                                                                                                                                                | 6 (5 -6)                  | 5 (4 – 6)                 | 6 (6 – 6)                 | 0.12         |
| Evaluable patients                                                                                                                                                                                                                                                                 | 44                        | 15                        | 23                        |              |
| 18. I get nauseous                                                                                                                                                                                                                                                                 | 6 (6 -6)                  | 6 (5 – 6)                 | 6 (6 – 6)                 | 0.59         |
| Evaluable patients                                                                                                                                                                                                                                                                 | 44                        | 15                        | 23                        |              |
| 19. My joints and/or muscles ache                                                                                                                                                                                                                                                  | 4 (4 – 5)                 | 4 (4 – 5)                 | 4 (4 – 5)                 | 0.82         |
| Evaluable patients                                                                                                                                                                                                                                                                 | 44                        | 15                        | 23                        |              |
| 20. I have back pain                                                                                                                                                                                                                                                               | 4 (4 – 5)                 | 4 (4 – 5)                 | 4 (4 – 5)                 | 0.37         |
| Evaluable patients                                                                                                                                                                                                                                                                 | 44                        | 15                        | 23                        |              |
| 21. My legs feel weak                                                                                                                                                                                                                                                              | 5 (4 – 6)                 | 4 (4 – 5)                 | 5 (4 – 6)                 | 0.15         |
| Evaluable patients                                                                                                                                                                                                                                                                 | 44                        | 15                        | 23                        |              |
| 22. I worry about my health                                                                                                                                                                                                                                                        | 4 (3 – 4)                 | 4 (4 – 4)                 | 4 (2 – 5)                 | 0.32         |
| Evaluable patients                                                                                                                                                                                                                                                                 | 44                        | 15                        | 23                        |              |
| 23. my ability to work is limited                                                                                                                                                                                                                                                  | 5 (4 – 5)                 | 4 (4 – 5)                 | 5 (4 – 6)                 | 0.06         |
| Evaluable patients                                                                                                                                                                                                                                                                 | 43                        | 15                        | 23                        |              |
| 24. I can concentrate well                                                                                                                                                                                                                                                         | 5 (4 – 6)                 | 5 (4 – 6)                 | 6 (5 – 6)                 | <b>0.03*</b> |
| Evaluable patients                                                                                                                                                                                                                                                                 | 44                        | 15                        | 23                        |              |
| 25. I am happy                                                                                                                                                                                                                                                                     | 5 (4 – 5)                 | 5 (4 – 5)                 | 5 (5 – 6)                 | 0.18         |
| Evaluable patients                                                                                                                                                                                                                                                                 | 43                        | 15                        | 23                        |              |
| 26. I feel full of energy                                                                                                                                                                                                                                                          | 4 (3 – 5)                 | 4 (3 – 5)                 | 5 (4 – 5)                 | 0.07         |
| Evaluable patients                                                                                                                                                                                                                                                                 | 44                        | 15                        | 23                        |              |
| 27. I feel physically fit                                                                                                                                                                                                                                                          | 4 (4 – 5)                 | 4 (3 – 5)                 | 5 (4 – 5)                 | 0.06         |
| Evaluable patients                                                                                                                                                                                                                                                                 | 44                        | 15                        | 23                        |              |
| 28. I get ill more easily than others                                                                                                                                                                                                                                              | 5 (5 – 6)                 | 5 (5 – 5)                 | 5 (5 - 6)                 | 0.34         |
| Evaluable patients                                                                                                                                                                                                                                                                 | 41                        | 14                        | 21                        |              |
| 29. I take a long time to recover from illnesses                                                                                                                                                                                                                                   | 5 (5 – 6)                 | 5 (5 – 6)                 | 5 (5 – 6)                 | 1            |
| Evaluable patients                                                                                                                                                                                                                                                                 | 39                        | 14                        | 20                        |              |
| 30. I cope well in emotional situations                                                                                                                                                                                                                                            | 5 (4 – 5)                 | 5 (4 – 5)                 | 5 (4 – 5)                 | 0.75         |
| Evaluable patients                                                                                                                                                                                                                                                                 | 43                        | 15                        | 23                        |              |
| <b>AddiQoL Score</b>                                                                                                                                                                                                                                                               | <b>79.7 (72.2 – 85.3)</b> | <b>76.1 (72.2 – 81.1)</b> | <b>83.3 (78.1 - 88.1)</b> | <b>0.07</b>  |
| LEGENDA. AddiQoL: health-related Quality of Life in Addison's disease <sup>10</sup><br>Each item can be scored on a scale from 1 (worst function) to 6 (best function), overall score may range in a scale from 16.7 to 100. Results are expressed as median (interquartile range) |                           |                           |                           |              |

**eTable 2. Vasoactive Inotropic Score**

|                                           |                                                    |                                        |
|-------------------------------------------|----------------------------------------------------|----------------------------------------|
| Inotropic Score (IS) =                    | dopamine dose                                      | ( $\mu\text{g}/\text{Kg}/\text{min}$ ) |
|                                           | + dobutamine dose                                  | ( $\mu\text{g}/\text{Kg}/\text{min}$ ) |
|                                           | + 100 · epinephrine dose                           | ( $\mu\text{g}/\text{Kg}/\text{min}$ ) |
| <b>Vasoactive-Inotropic Score (VIS) =</b> | IS                                                 |                                        |
|                                           | + 10 · PDE inhibitor (milrinone or olprinone) dose | ( $\mu\text{g}/\text{Kg}/\text{min}$ ) |
|                                           | + 100 · norepinephrine dose                        | ( $\mu\text{g}/\text{Kg}/\text{min}$ ) |
|                                           | + 10000 · vasopressin dose                         | (U/Kg/min)                             |
| PDE: phosphodiesterase                    |                                                    |                                        |
